# Supplementary material for: Production of modified sunflowers seed shells for the removal of bisphenol A
Source: Royal Society of Chemistry journal article supplement (doi:10.1039/d0ra09137e), 2021-01-01
Supplement: d0ra09137e1.pdf [file d0ra09137e1.pdf]

### Supplementary data

## **Production of modified sunflowers seeds shells for the removal of bisphenol A**

Bahdja Hayoun<sup>a,c\*</sup>, Saliha Bourouina-Bacha<sup>b</sup>, Marta Pazos<sup>c</sup>, M<sup>a</sup> Angeles Sanromán<sup>c</sup>, Hayette Benkhenouche-Bouchene<sup>b</sup>, Ourida Deflaoui<sup>b</sup>, Nassima Hamaidi-Maouche<sup>b</sup>, Mustapha Bourouina<sup>a</sup>.

<sup>a</sup>Department of Chemistry, Faculty of Exact Sciences, University of Bejaia, Bejaia 06000, Algeria.

Email: hayba.bahdja@gmail.com, bouryas@yahoo.fr.

<sup>b</sup>Department of Process Engineering, Faculty of Technology, University of Bejaia, Bejaia 06000, Algeria.

Email: lgebej@yahoo.fr, hayette.bouchene@gmail.com, deflaoui1993@gmail.com,

nmaouchehamaidi@yahoo.fr.

<sup>c</sup>CINTECX-Universidade de Vigo, Department of Chemical Engineering Campus As Lagoas-Marcosende, University of Vigo, 36310 Vigo, Spain.

Email: mcurras@uvigo.es, sanroman@uvigo.es.

**Table S1.** Parameters and errors for Canonical and Fractal-like kinetic models at different BPA initial concentration

#### • Canonical kinetic models

|        |                                | BPA Initial concentration (mg/L) |         |         |         |         |
|--------|--------------------------------|----------------------------------|---------|---------|---------|---------|
| Models | Parameters                     | 25                               | 50      | 75      | 100     | 125     |
|        | $q_e \text{ exp}$<br>(mg/g)    | 15.2632                          | 29.9248 | 42.9574 | 53.7343 | 63.7343 |
|        | $t_{0.5 \text{ exp}}$<br>(min) | 5.6                              | 7.5     | 7.4     | 8.1     | 8.8     |
| <hr/>  |                                |                                  |         |         |         |         |
| PFO    | $q_e$ (mg/g)                   | 14.0397                          | 28.0493 | 41.1763 | 51.0404 | 59.2516 |
|        | $K_1$ (1/min)                  | 0.1463                           | 0.0803  | 0.0813  | 0.0694  | 0.0570  |
|        | $t_{0.5}$ (min)                | 4.7                              | 8.6     | 8.5     | 10.0    | 12.2    |
|        | $R^2$                          | 0.9701                           | 0.9678  | 0.9763  | 0.9682  | 0.9404  |
|        | ARE (%)                        | 0.4038                           | 0.5031  | 0.4220  | 0.5290  | 0.7559  |
|        | RMSE (%)                       | 0.8728                           | 1.8539  | 2.3271  | 3.3892  | 5.4958  |
| <hr/>  |                                |                                  |         |         |         |         |
| PSO    | $q_e$ (mg/g)                   | 14.5838                          | 29.719  | 43.5184 | 54.314  | 63.6471 |
|        | $k_2$ (g/mg min)               | 0.0182                           | 0.0043  | 0.0030  | 0.0020  | 0.0014  |
|        | $t_{0.5}$ (min)                | 3.8                              | 7.9     | 7.6     | 9.2     | 11.6    |
|        | $R^2$                          | 0.9885                           | 0.9956  | 0.9984  | 0.9961  | 0.9838  |
|        | ARE (%)                        | 0.2777                           | 0.1780  | 0.1090  | 0.1820  | 0.3886  |
|        | RMSE (%)                       | 0.5421                           | 0.6787  | 0.6073  | 1.1699  | 2.8310  |

- **Fractal-like kinetic models**

|                |                                          | BPA Initial concentration (mg/L) |         |         |         |         |
|----------------|------------------------------------------|----------------------------------|---------|---------|---------|---------|
| Models         | Parameters                               | 25                               | 50      | 75      | 100     | 125     |
|                | $q_e \text{ exp}$<br>(mg/g)              | 15.2632                          | 29.9248 | 42.9574 | 53.7343 | 63.7343 |
|                | $t_{0.5 \text{ exp}}$<br>(min)           | 5.6                              | 7.5     | 7.4     | 8.1     | 8.8     |
| <b>Weibull</b> |                                          |                                  |         |         |         |         |
|                | $q_e$ (mg/g)                             | 66.0000                          | 30.2553 | 43.1313 | 54.7155 | 72.4644 |
|                | $\tau$                                   | >>                               | 14.0    | 12.6    | 16.6    | 39.0    |
|                | $\alpha$                                 | 0                                | 0.4138  | 0.4812  | 0.453   | 0.3518  |
|                | $t_{0.5}$ (min)                          | >>                               | 5.8     | 5.9     | 7.4     | 13.8    |
|                | $R^2$                                    | 0.9819                           | 0.9996  | 0.9998  | 0.9996  | 0.9994  |
|                | $ARE$ (%)                                | 0.6498                           | 0.0454  | 0.0247  | 0.0398  | 0.0591  |
|                | $RMSE$ (%)                               | 0.2181                           | 0.2395  | 0.2287  | 0.4197  | 0.6318  |
| <b>Hill</b>    |                                          |                                  |         |         |         |         |
|                | $q_e$ (mg/g)                             | 64                               | 32.3037 | 45.0877 | 58.4639 | 86.379  |
|                | $\tau$                                   | >>                               | 7.7     | 7.2     | 9.4     | 29.1    |
|                | $\alpha$                                 | 0                                | 0.6344  | 0.7864  | 0.6843  | 0.4293  |
|                | $t_{0.5}$ (min)                          | >>                               | 7.7     | 7.2     | 9.4     | 29.1    |
|                | $R^2$                                    | 0.9987                           | 0.9997  | 0.9997  | 0.9997  | 0.9993  |
|                | $ARE$ (%)                                | 0.0851                           | 0.0404  | 0.0473  | 0.0433  | 0.0679  |
|                | $RMSE$ (%)                               | 0.2182                           | 0.2031  | 0.3183  | 0.4062  | 0.7092  |
| <b>PFOF</b>    |                                          |                                  |         |         |         |         |
|                | $q_e$ (mg/g)                             | 75.1286                          | 30.2553 | 43.1313 | 54.7155 | 72.4644 |
|                | $K_{If}$<br>( $1/\text{min}^{(1-h)}$ )   | 0.0120                           | 0.1387  | 0.1424  | 0.1268  | 0.0969  |
|                | $h$                                      | 0.9074                           | 0.5862  | 0.5188  | 0.5470  | 0.6482  |
|                | $t_{0.5}$ (min)                          | >>                               | 5.8     | 5.9     | 7.4     | 13.8    |
|                | $R^2$                                    | 0.9987                           | 0.9996  | 0.9998  | 0.9996  | 0.9994  |
|                | $ARE$ (%)                                | 0.0855                           | 0.0454  | 0.0247  | 0.0398  | 0.0591  |
|                | $RMSE$ (%)                               | 0.2181                           | 0.2395  | 0.2287  | 0.4197  | 0.6318  |
| <b>PSOf</b>    |                                          |                                  |         |         |         |         |
|                | $q_e$ (mg/g)                             | 110.399                          | 32.3037 | 45.0877 | 58.4639 | 86.3791 |
|                | $K_{2f}$ (g/mg<br>$\text{min}^{(1-h)}$ ) | 0.0001                           | 0.0054  | 0.0037  | 0.0025  | 0.0012  |
|                | $h$                                      | 0.9030                           | 0.3656  | 0.2136  | 0.3157  | 0.5707  |
|                | $t_{0.5}$ (min)                          | >>                               | 7.7     | 7.2     | 9.4     | 29.1    |
|                | $R^2$                                    | 0.9932                           | 0.9730  | 0.9987  | 0.9969  | 0.9918  |
|                | $ARE$ (%)                                | 4.4274                           | 3.7950  | 2.5555  | 1.4419  | 0.9662  |
|                | $RMSE$ (%)                               | 0.2181                           | 0.2031  | 0.3183  | 0.4062  | 0.7092  |

**Table S2.** Parameters and errors for Canonical and Fractal-like kinetic models at different adsorbent dosage

- **Canonical kinetic models**

|            |                                | m (g/L) |         |         |         |
|------------|--------------------------------|---------|---------|---------|---------|
| Models     | Parameters                     | 0.5     | 1       | 1.5     | 2       |
|            | $q_e \text{ exp}$<br>(mg/g)    | 59.3985 | 39.1353 | 29.9248 | 22.6316 |
|            | $t_{0.5} \text{ exp}$<br>(min) | 16.5    | 8.5     | 7.5     | 5.4     |
| <b>PFO</b> |                                |         |         |         |         |
|            | $q_e$ (mg/g)                   | 54.0347 | 36.4220 | 28.0493 | 21.8038 |
|            | $K_1$ (1/min)                  | 0.0361  | 0.0660  | 0.0803  | 0.1437  |
|            | $t_{0.5}$ (min)                | 19.2    | 10.5    | 8.6     | 4.8     |
|            | $R^2$                          | 0.9497  | 0.9491  | 0.9678  | 0.9874  |
|            | $ARE$ (%)                      | 0.7699  | 0.6847  | 0.5031  | 0.2546  |
|            | $RMSE$ (%)                     | 23.3391 | 9.5002  | 3.4369  | 0.7645  |
| <b>PSO</b> |                                |         |         |         |         |
|            | $q_e$ (mg/g)                   | 59.1357 | 38.9552 | 29.7190 | 22.5445 |
|            | $k_2$ (g/mg min)               | 0.0009  | 0.0026  | 0.0043  | 0.0126  |
|            | $t_{0.5}$ (min)                | 19.0    | 10.0    | 7.9     | 3.5     |
|            | $R^2$                          | 0.9843  | 0.9879  | 0.9956  | 0.9985  |
|            | $ARE$ (%)                      | 0.4315  | 0.3312  | 0.1780  | 0.0897  |
|            | $RMSE$ (%)                     | 2.6121  | 1.4918  | 0.6787  | 0.3054  |

- **Fractal-like kinetic models**

|         |                                          | m (g/L) |         |         |         |
|---------|------------------------------------------|---------|---------|---------|---------|
| Models  | Parameters                               | 0.5     | 1       | 1.5     | 2       |
|         | $q_e \text{ exp (mg/g)}$                 | 59.3985 | 39.1353 | 29.9248 | 22.6316 |
|         | $t_{0.5} \text{ exp (min)}$              | 16.5    | 8.5     | 7.5     | 5.4     |
| Weibull | $q_e \text{ (mg/g)}$                     | 67.9712 | 42.4336 | 30.2553 | 22.6732 |
|         | $\tau$                                   | 67.7    | 26.0    | 14.0    | 4.0     |
|         | $\alpha$                                 | 0.4113  | 0.3627  | 0.4138  | 0.3537  |
|         | $t_{0.5} \text{ (min)}$                  | 27.8    | 9.5     | 5.8     | 1.4     |
|         | $R^2$                                    | 0.9990  | 0.9990  | 0.9996  | 0.9993  |
|         | $ARE \text{ (%)}$                        | 0.0742  | 0.0712  | 0.0454  | 0.0509  |
|         | $RMSE \text{ (%)}$                       | 0.7533  | 0.4984  | 0.2395  | 0.2354  |
| Hill    | $q_e \text{ (mg/g)}$                     | 82.6845 | 48.2244 | 32.3037 | 23.2823 |
|         | $\tau$                                   | 57.2    | 15.9    | 7.7     | 2.4     |
|         | $\alpha$                                 | 0.4887  | 0.4776  | 0.6344  | 0.6864  |
|         | $t_{0.5} \text{ (min)}$                  | 57.2    | 15.9    | 7.7     | 2.4     |
|         | $R^2$                                    | 0.9991  | 0.9990  | 0.9997  | 0.9994  |
|         | $ARE \text{ (%)}$                        | 0.0678  | 0.0683  | 0.0404  | 0.0451  |
|         | $RMSE \text{ (%)}$                       | 0.7200  | 0.5075  | 0.2031  | 0.2162  |
| PFOf    | $q_e \text{ (mg/g)}$                     | 67.9712 | 42.4336 | 30.2553 | 22.6732 |
|         | $K_{1f}$<br>( $1/\text{min}^{(1-h)}$ )   | 0.0727  | 0.1112  | 0.1387  | 0.2162  |
|         | $h$                                      | 0.5887  | 0.6373  | 0.5862  | 0.6463  |
|         | $t_{0.5} \text{ (min)}$                  | 27.8    | 9.5     | 5.8     | 1.4     |
|         | $R^2$                                    | 0.9990  | 0.9990  | 0.9996  | 0.9993  |
|         | $ARE \text{ (%)}$                        | 0.0742  | 0.0712  | 0.0454  | 0.0509  |
|         | $RMSE \text{ (%)}$                       | 0.7533  | 0.4984  | 0.2395  | 0.2354  |
| PSOf    | $q_e \text{ (mg/g)}$                     | 82.6845 | 48.2244 | 32.3037 | 23.2823 |
|         | $K_{2f}$ (g/mg<br>$\text{min}^{(1-h)}$ ) | 0.0008  | 0.0026  | 0.0054  | 0.0162  |
|         | $h$                                      | 0.5113  | 0.5224  | 0.3656  | 0.3136  |
|         | $t_{0.5} \text{ (min)}$                  | 57.2    | 15.9    | 7.7     | 2.4     |
|         | $R^2$                                    | 0.9991  | 0.9776  | 0.9947  | 0.9683  |
|         | $ARE \text{ (%)}$                        | 0.0678  | 3.0004  | 2.1930  | 1.8639  |
|         | $RMSE \text{ (%)}$                       | 0.7200  | 0.5075  | 0.2031  | 0.2162  |

**Table S3.** Parameters and errors for Canonical and Fractal-like kinetic models at different initial pH

• **Canonical kinetic models**

|            |                                | pH      |         |         |         |
|------------|--------------------------------|---------|---------|---------|---------|
| Model      | Parameters                     | 2       | 3       | 5       | 7       |
|            | $q_e \text{ exp}$<br>(mg/g)    | 29.9248 | 27.3580 | 23.8718 | 22.5867 |
|            | $t_{0.5 \text{ exp}}$<br>(min) | 7.6     | 8.7     | 5.5     | 5.6     |
| <b>PFO</b> |                                |         |         |         |         |
|            | $q_e$ (mg/g)                   | 28.0493 | 26.5686 | 23.8784 | 22.5036 |
|            | $K_1$ (1/min)                  | 0.08027 | 0.06513 | 0.12069 | 0.12382 |
|            | $t_{0.5}$ (min)                | 8.6     | 10.6    | 5.7     | 5.6     |
|            | $R^2$                          | 0.9678  | 0.9777  | 0.9808  | 0.9878  |
|            | $ARE$ (%)                      | 0.5031  | 0.4515  | 0.3195  | 0.2192  |
|            | $RMSE$ (%)                     | 1.8539  | 1.4842  | 1.1905  | 0.8909  |
| <b>PSO</b> |                                |         |         |         |         |
|            | $q_e$                          | 29.7190 | 28.2686 | 24.8750 | 23.3327 |
|            | $K_2$ (g/mg<br>min)            | 0.0043  | 0.0036  | 0.0087  | 0.0102  |
|            | $t_{0.5}$ (min)                | 7.9     | 9.7     | 4.6     | 4.2     |
|            | $R^2$                          | 0.9956  | 0.9986  | 0.9963  | 0.9964  |
|            | $ARE$ (%)                      | 0.1780  | 0.1127  | 0.1601  | 0.1497  |
|            | $RMSE$ (%)                     | 0.6787  | 0.3737  | 0.5204  | 0.4840  |

• Fractal-like kinetic models

|                |                                          | pH      |         |         |         |
|----------------|------------------------------------------|---------|---------|---------|---------|
| Model          | Parameters                               | 2       | 3       | 5       | 7       |
|                | $q_e \text{ exp}$<br>(mg/g)              | 29.9248 | 27.3580 | 23.8718 | 22.5866 |
|                | $t_{0.5 \text{ exp}}$<br>(min)           | 7.6     | 8.7     | 5.5     | 5.6     |
| <b>Weibull</b> |                                          |         |         |         |         |
|                | $q_e$ (mg/g)                             | 30.2553 | 27.6631 | 24.801  | 22.9315 |
|                | $\tau$                                   | 14.0313 | 16.3181 | 6.5185  | 6.5049  |
|                | $\alpha$                                 | 0.4138  | 0.5453  | 0.4185  | 0.5197  |
|                | $t_{0.5}$ (min)                          | 5.8     | 8.3     | 2.7     | 3.2     |
|                | $R^2$                                    | 0.9996  | 0.9997  | 0.9976  | 0.9970  |
|                | $ARE$ (%)                                | 0.0454  | 0.0376  | 0.1103  | 0.1361  |
|                | $RMSE$ (%)                               | 0.2395  | 0.1869  | 0.4930  | 0.5189  |
| <b>Hill</b>    |                                          |         |         |         |         |
|                | $q_e$ (mg/g)                             | 32.3037 | 28.956  | 25.5368 | 23.3327 |
|                | $\tau$                                   | 7.7025  | 9.636   | 3.8095  | 4.2059  |
|                | $\alpha$                                 | 0.6344  | 0.8638  | 0.7672  | 1       |
|                | $t_{0.5}$ (min)                          | 7.7     | 9.6     | 3.8     | 4.2     |
|                | $R^2$                                    | 0.9997  | 0.9992  | 0.9972  | 0.9964  |
|                | $ARE$ (%)                                | 0.0404  | 0.0762  | 0.1195  | 0.1497  |
|                | $RMSE$ (%)                               | 0.2031  | 0.3231  | 0.5361  | 0.5727  |
| <b>PFOF</b>    |                                          |         |         |         |         |
|                | $q_e$ (mg/g)                             | 30.2553 | 27.6631 | 24.8010 | 22.9315 |
|                | $K_{1f}$<br>( $1/\text{min}^{(1-h)}$ )   | 0.1387  | 0.1190  | 0.1910  | 0.1964  |
|                | $h$                                      | 0.5862  | 0.4548  | 0.5815  | 0.4803  |
|                | $t_{0.5}$ (min)                          | 5.8     | 8.3     | 2.7     | 3.2     |
|                | $R^2$                                    | 0.9996  | 0.9997  | 0.9976  | 0.9970  |
|                | $ARE$ (%)                                | 0.0454  | 0.0376  | 0.1103  | 0.1361  |
|                | $RMSE$ (%)                               | 0.2395  | 0.1869  | 0.4930  | 0.5189  |
|                | $q_e$                                    | 32.3037 | 28.956  | 25.5368 | 23.331  |
|                | $K_{2f}$ (g/mg<br>$\text{min}^{(1-h)}$ ) | 0.0054  | 0.0042  | 0.0108  | 0.0102  |
| <b>PSOF</b>    |                                          |         |         |         |         |
|                | $h$                                      | 0.3656  | 0.1362  | 0.2328  | 0.0000  |
|                | $t_{0.5}$ (min)                          | 7.7025  | 9.6360  | 3.8095  | 4.2071  |
|                | $R^2$                                    | 0.9997  | 0.9992  | 0.9972  | 0.9964  |
|                | $ARE$ (%)                                | 0.0404  | 0.0762  | 0.1195  | 0.1498  |
|                | $RMSE$ (%)                               | 0.2031  | 0.3231  | 0.5361  | 0.5727  |

**Table S4.** Values of the diffusivities, of adjustments errors and  $R^2$  of the Vermeulen and Fractal Vermeulen models.

| Parameters |                |                 | Vermeulen model                          |             |        |            | Fractal Vermeulen model                     |      |             |        |            |
|------------|----------------|-----------------|------------------------------------------|-------------|--------|------------|---------------------------------------------|------|-------------|--------|------------|
| pH         | $m_s$<br>(g/L) | $C_0$<br>(mg/L) | $D_v \cdot 10^12$<br>(m <sup>2</sup> /s) | RMSE<br>(%) | $R^2$  | ARE<br>(%) | $D_{vf} \cdot 10^12$<br>(m <sup>2</sup> /s) | $h$  | RMSE<br>(%) | $R^2$  | ARE<br>(%) |
| 2          | 1.5            | 25              | 1.945                                    | 0.0822      | 0.9665 | 0.6250     | 11.707                                      | 0.63 | 0.0203      | 0.9968 | 0.1300     |
| 2          | 1.5            | 50              | 1.133                                    | 0.0506      | 0.9869 | 0.3998     | 4.046                                       | 0.40 | 0.0086      | 0.9995 | 0.0586     |
| 2          | 1.5            | 75              | 1.305                                    | 0.0342      | 0.9933 | 0.2577     | 3.454                                       | 0.31 | 0.0058      | 0.9998 | 0.0347     |
| 2          | 1.5            | 100             | 1.050                                    | 0.0404      | 0.9906 | 0.3069     | 2.943                                       | 0.32 | 0.0088      | 0.9995 | 0.0538     |
| 2          | 1.5            | 125             | 0.740                                    | 0.0571      | 0.9801 | 0.4641     | 2.492                                       | 0.33 | 0.0185      | 0.9978 | 0.1317     |
| 2          | 0.5            | 50              | 0.447                                    | 0.0488      | 0.9873 | 0.4808     | 1.236                                       | 0.25 | 0.0176      | 0.9978 | 0.1185     |
| 2          | 1              | 50              | 0.862                                    | 0.0574      | 0.9804 | 0.4435     | 3.033                                       | 0.36 | 0.0166      | 0.9981 | 0.1197     |
| 2          | 1.5            | 50              | 1.133                                    | 0.0506      | 0.9869 | 0.3998     | 4.046                                       | 0.40 | 0.0086      | 0.9995 | 0.0586     |
| 2          | 2              | 50              | 2.606                                    | 0.0411      | 0.9907 | 0.2812     | 10.550                                      | 0.52 | 0.0100      | 0.9993 | 0.0556     |
| 2          | 1.5            | 50              | 1.133                                    | 0.05060     | 0.9869 | 0.3998     | 4.046                                       | 0.40 | 0.0086      | 0.9995 | 0.0586     |
| 3          | 1.5            | 50              | 1.114                                    | 0.02239     | 0.9966 | 0.1563     | 2.052                                       | 0.19 | 0.0068      | 0.9997 | 0.0400     |
| 5          | 1.5            | 50              | 2.477                                    | 0.03834     | 0.9893 | 0.2683     | 5.782                                       | 0.32 | 0.0313      | 0.9959 | 0.1528     |
| 7          | 1.5            | 50              | 2.583                                    | 0.02761     | 0.9942 | 0.1724     | 4.847                                       | 0.24 | 0.0235      | 0.9969 | 0.1347     |

**Table S5.** Values of the intra-particle diffusivities in the treated adsorbent and the mass transfer coefficient in the liquid film.

| Parameters |                |                 | Film mass transfer (m/s) |                           | Diffusivities (m <sup>2</sup> /s) |          | $D_m/D_{app}$ | $Biot$ |
|------------|----------------|-----------------|--------------------------|---------------------------|-----------------------------------|----------|---------------|--------|
| pH         | $m_s$<br>(g/L) | $C_0$<br>(mg/L) | $k_{MW}$                 | $k_{FS}$<br>$\times 10^6$ | $D_{app}$<br>$\times 10^{12}$     | $D_{st}$ |               |        |
| 2          | 1.5            | 25              | 1.9522                   | 3.6531                    | 2.0458                            | 0.9412   | 288           | 68     |
|            |                | 50              | 1.2108                   | 2.3304                    | 1.5275                            | 0.7299   | 386           | 58     |
|            |                | 75              | 1.1707                   | 2.1912                    | 1.5481                            | 0.7779   | 380           | 58     |
|            |                | 100             | 0.9124                   | 1.8846                    | 1.4144                            | 0.6965   | 416           | 52     |
|            |                | 125             | 0.7237                   | 1.7904                    | 1.3018                            | 0.5962   | 452           | 48     |
|            | 0.5            | 50              | 1.1602                   | 2.9343                    | 0.6943                            | 0.4190   | 848           | 61     |
|            | 1              |                 | 1.2144                   | 2.8244                    | 1.3478                            | 0.6475   | 437           | 50     |
|            | 1.5            |                 | 1.2108                   | 2.3304                    | 1.5275                            | 0.7299   | 386           | 58     |
|            | 2              |                 | 1.6330                   | 2.6956                    | 2.1215                            | 1.0391   | 278           | 74     |
|            | 2              |                 | 1.2108                   | 2.3304                    | 1.5074                            | 0.7299   | 391           | 59     |
| 3          | 1.5            | 0.9546          | 1.7580                   | 1.3168                    | 0.7079                            | 447      | 58            |        |
| 5          |                | 1.0852          | 2.5892                   | 2.0830                    | 1.0281                            | 283      | 48            |        |
| 7          |                | 0.9788          | 2.4122                   | 2.0458                    | 1.0453                            | 288      | 46            |        |



**Table S6.** Parameters values of canonical isotherms models and the corresponding adjustment errors and determination coefficient.

| Isotherm models | Parameters                         | Values        | RMSE (%) | ARE (%) | R <sup>2</sup> |
|-----------------|------------------------------------|---------------|----------|---------|----------------|
| Temkin          | $B_T$ (J/mol)                      | 20.2375       | 0.8676   | 0.0937  | 0.9985         |
|                 | $K_T$ (L/g)                        | 0.7518        |          |         |                |
| Langmuir        | $q_{mL}$ (mg/g)                    | 88.9451       | 0.9575   | 0.1313  | 0.9979         |
|                 | $K_L$ (L:mg)                       | 0.08207       |          |         |                |
|                 | $R_L$                              | 0.299 - 0.827 |          |         |                |
| Freundlich      | $K_F$<br>(mg/g) (L/g) <sup>n</sup> | 11.7899       | 3.9786   | 0.4861  | 0.9692         |
|                 | $n_F$                              | 1.98          |          |         |                |
| D-R             | $q_{mD-R}$ (mg/g)                  | 57.7855       | 7.5238   | 0.9788  | 0.9056         |
|                 | $B_{D-R}$                          | 3.7 E-06      |          |         |                |
|                 | $E$ (KJ/mol)                       | 0.367         |          |         |                |
| Jovanovich      | $q_{mJ}$ (mg/g)                    | 66.0573       | 0.8955   | 0.0809  | 0.9978         |
|                 | $b$ (mg/L)                         | 10.445        |          |         |                |

**Table S7.** Parameters values of like-fractal isotherms models and the corresponding adjustment errors and determination coefficient.

| Isotherm models | $q_{max}$<br>(mg/g) | $Ce_{0,5}$<br>(min) | $a$ | $b$  | $c$ | $RMSE$<br>(%) | $ARE$<br>(%) | $R^2$  |
|-----------------|---------------------|---------------------|-----|------|-----|---------------|--------------|--------|
| GBS             | 106.7490            | 18.07               | 1.4 | 8.7  | 3.4 | 0.8738        | 0.0451       | 0.9995 |
| BG              | 73.1083             | 8.36                | 1.1 | 10.0 | 0.5 | 0.9039        | 0.0632       | 0.9975 |
| BS              | 67.2558             | 7.44                | 1.0 | 10.9 | 0.0 | 1.1990        | 0.1019       | 0.9981 |
| HS              | 79.1344             | 9.48                | 1.2 | 9.5  | 1.0 | 0.7604        | 0.0458       | 0.9992 |
